# Supplementary material
Source: MDPI journal article supplement (https://www.mdpi.com/search?q=molbank-2023-M1561)
Supplement: s002 [file molbank-2023-M1561-s002.inchi]

InChI=1/C21H27N/c1-18(20-13-7-3-8-14-20)22(21-15-9-4-10-16-21)17-19-11-5-2-6-12-19/h2-3,5-8,11-14,18,21H,4,9-10,15-17H2,1H3/t18-/s2
AuxInfo=1/0/N:14,19,11,2,18,20,10,12,1,3,17,21,9,13,5,4,15,7,16,8,22,6/E:(5,6)(7,8)(9,10)(11,12)(13,14)(15,16)/rA:22CCCCCNCCCCCCCCCCCCCCCC/rB:s1;s2;s3;s1;;s6;s7;d8;s9;d10;s11;s8d12;P7;s6;s15;d16;s17;d18;s19;s16d20;s4s5s6;/rC:-1.3337,-2.7005,0;0,-3.4705,0;1.3337,-2.7005,0;1.3337,-1.1603,0;-1.3337,-1.1603,0;0,1.1497,0;-1.3337,1.9197,0;-2.6675,1.1497,0;-4.0012,1.9197,0;-5.3347,1.1497,0;-5.3347,-.3905,0;-4.0012,-1.1603,0;-2.6675,-.3905,0;-1.3337,3.4705,0;1.3337,1.9197,0;2.6675,1.1497,0;2.6675,-.3905,0;4.0012,-1.1603,0;5.3347,-.3905,0;5.3347,1.1497,0;4.0012,1.9197,0;0,-.3905,0;
