# Supplementary material
Source: MDPI journal article supplement (https://www.mdpi.com/search?q=molbank-2023-M1561)
Supplement: s002 [file molbank-2023-M1561-s002.mol]

compound1.mol
  ChemDraw01192309172D

 22 24  0  0  0  0  0  0  0  0999 V2000
   -0.7145   -1.4467    0.0000 C   0  0  0  0  0  0  0  0  0  0  0  0
    0.0000   -1.8592    0.0000 C   0  0  0  0  0  0  0  0  0  0  0  0
    0.7145   -1.4467    0.0000 C   0  0  0  0  0  0  0  0  0  0  0  0
    0.7145   -0.6216    0.0000 C   0  0  0  0  0  0  0  0  0  0  0  0
   -0.7145   -0.6216    0.0000 C   0  0  0  0  0  0  0  0  0  0  0  0
    0.0000    0.6159    0.0000 N   0  0  0  0  0  0  0  0  0  0  0  0
   -0.7145    1.0284    0.0000 C   0  0  0  0  0  0  0  0  0  0  0  0
   -1.4290    0.6159    0.0000 C   0  0  0  0  0  0  0  0  0  0  0  0
   -2.1435    1.0284    0.0000 C   0  0  0  0  0  0  0  0  0  0  0  0
   -2.8579    0.6159    0.0000 C   0  0  0  0  0  0  0  0  0  0  0  0
   -2.8579   -0.2092    0.0000 C   0  0  0  0  0  0  0  0  0  0  0  0
   -2.1435   -0.6216    0.0000 C   0  0  0  0  0  0  0  0  0  0  0  0
   -1.4290   -0.2092    0.0000 C   0  0  0  0  0  0  0  0  0  0  0  0
   -0.7145    1.8592    0.0000 C   0  0  0  0  0  0  0  0  0  0  0  0
    0.7145    1.0284    0.0000 C   0  0  0  0  0  0  0  0  0  0  0  0
    1.4290    0.6159    0.0000 C   0  0  0  0  0  0  0  0  0  0  0  0
    1.4290   -0.2092    0.0000 C   0  0  0  0  0  0  0  0  0  0  0  0
    2.1435   -0.6216    0.0000 C   0  0  0  0  0  0  0  0  0  0  0  0
    2.8579   -0.2092    0.0000 C   0  0  0  0  0  0  0  0  0  0  0  0
    2.8579    0.6159    0.0000 C   0  0  0  0  0  0  0  0  0  0  0  0
    2.1435    1.0284    0.0000 C   0  0  0  0  0  0  0  0  0  0  0  0
    0.0000   -0.2092    0.0000 C   0  0  0  0  0  0  0  0  0  0  0  0
  1  2  1  0      
  2  3  1  0      
  3  4  1  0      
  4 22  1  0      
 22  5  1  0      
  5  1  1  0      
  6  7  1  0      
  7  8  1  0      
  8  9  2  0      
  9 10  1  0      
 10 11  2  0      
 11 12  1  0      
 12 13  2  0      
 13  8  1  0      
  7 14  1  1      
  6 15  1  0      
 15 16  1  0      
 16 17  2  0      
 17 18  1  0      
 18 19  2  0      
 19 20  1  0      
 20 21  2  0      
 21 16  1  0      
 22  6  1  0      
M  END
